# Supplementary material for: Chimeric peptide constructs comprising linear B-cell epitopes: application to the serodiagnosis of infectious diseases
Source: PubMed Central journal article supplement (PMC4543967; doi:10.1038/srep13364), 2015-08-21
Supplement: srep13364-s1.pdf [file srep13364-s1.pdf]

## Chimeric peptide constructs comprising linear B-cell epitopes: application to the serodiagnosis of infectious diseases

Yudong Lu<sup>1,2†</sup>, Zhong Li<sup>1†</sup>, Huan Teng<sup>3</sup>, Hongke Xu<sup>1</sup>, Songnan Qi<sup>3</sup>, Jian'an He<sup>4</sup>,  
©Dayong Gu<sup>4</sup>, Qijun Chen<sup>5\*</sup>, Hongwei Ma<sup>1\*</sup>

<sup>1</sup>Nano-Bio-Chem Centre, Suzhou Institute of Nano-Tech and Nano-Bionics, Chinese Academy of Sciences, Suzhou, 215123, P. R. China. <sup>2</sup>Graduate University of Chinese Academy of Sciences, Beijing, 100049, P. R. China. <sup>3</sup>Suzhou SJ Biomaterials Co. Ltd. Suzhou, 215123, P. R. China. <sup>4</sup>Central Laboratory of Health Quarantine, Shenzhen International Travel Health Care Center, Shenzhen Entry-exit Inspection and Quarantine Bureau, Shenzhen, 518033, P. R. China. <sup>5</sup>Key Laboratory of Zoonosis, Jilin University, Changchun, 130062, P. R. China.

<sup>†</sup>These authors contributed equally to this work.

\*E-mail: hwma2008@sinano.ac.cn., cqj@jlu.edu.cn

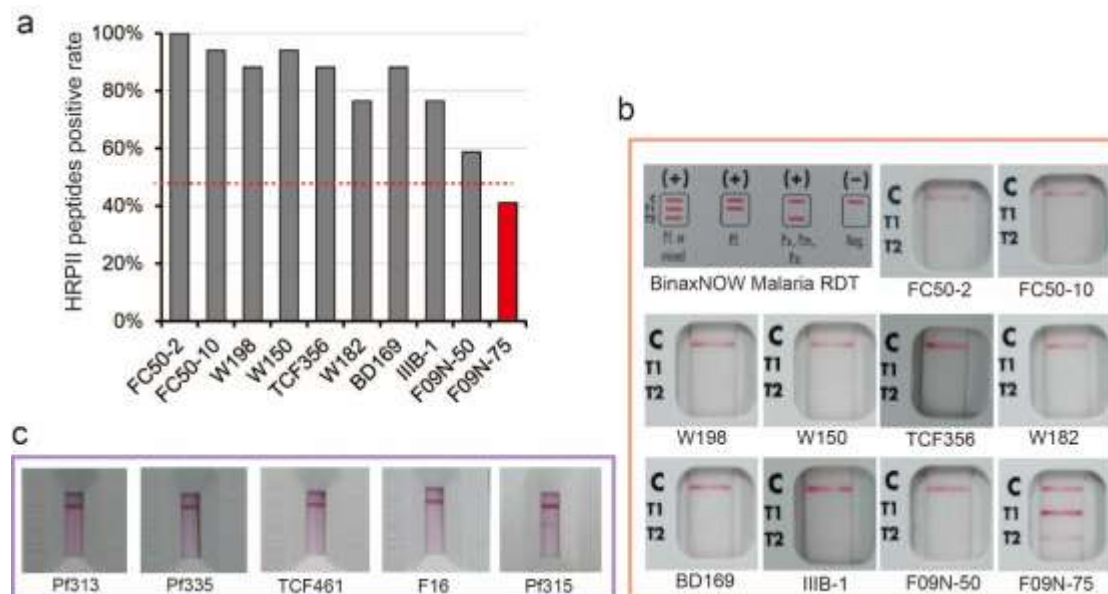

**Extended Data Figure 1** The HRPII protein (P01 in **Extended Data Table 1**) was divided into 18 peptides and we defined "HRPII peptides positive rate" as the percentage of these 18 peptides with SNR  $\geq 2$  response from seroscreening. For example, serum FC50-2 had 18 peptides with SNR  $\geq 2$  response so its "HRPII peptides positive rate" was 100%. 22 out of 289 malaria positive serum were found to have over 50% "HRPII peptides positive rate". These serum were negative to a widely used commercial RDT (BinaxNow) which was based on HRPII detection. Only 1 serum (F09N-75) with 40% "HRPII peptides positive rate" had positive result in HRPII based RDT (a,b). Similarly, 5 malaria positive samples were found to carry anti-Lactate dehydrogenase (LDH) antibodies and showed false negative to LDH based RDT

(Wondfo) (c). These results demonstrated that proteins as biomarkers have to face the intrinsic false negative problem due to neutralizing antibodies.

**Extended Data Table 1:** Index of 40 proteins<sup>1</sup> used for epitope discovery\*.

| Protein ID | Protein name ( <i>P. falciparum</i> ) | NCBI ID        | Protein ID | Protein name ( <i>P. falciparum</i> ) | NCBI ID        |
|------------|---------------------------------------|----------------|------------|---------------------------------------|----------------|
| P01        | HRPII                                 | XP_002808743.1 | P21        | EBA-175                               | XP_001349207.2 |
| P02        | HRPIII                                | CAX64409.1     | P22        | EBA-181                               | XP_001350957.1 |
| P03        | MSP1                                  | XP_001352170.1 | P23        | EBA-140                               | XP_001349859.1 |
| P04        | MSP2                                  | XP_001349578.1 | P24        | EBA-165                               | XP_001351546.1 |
| P05        | MCP1                                  | XP_001347552.1 | P25        | AMA-1                                 | XP_001348015.1 |
| P06        | DBLMSP                                | XP_001347632.1 | P26        | PF332                                 | XP_001348162.2 |
| P07        | GLURP                                 | XP_001347628.1 | P27        | RAP1                                  | XP_001348275.1 |
| P08        | MSP 3                                 | XP_001347629.1 | P28        | RhopH2                                | XP_002808967.1 |
| P09        | MSP 4                                 | XP_001349580.1 | P29        | RhopH3                                | XP_001351928.1 |
| P10        | MSP 5                                 | XP_001349579.1 | P30        | CLAG2                                 | XP_001349709.1 |
| P11        | MSP 6                                 | XP_001347630.1 | P31        | CLAG3.1                               | XP_001351100.1 |
| P12        | MSP7.1                                | XP_001350074.1 | P32        | CLAG3.2                               | XP_001351099.1 |
| P13        | MSP7.2                                | XP_001350075.1 | P33        | CLAG9                                 | XP_001352222.1 |
| P14        | MSP7.3                                | XP_002809050.1 | P34        | CLAG8                                 | XP_002808744.1 |
| P15        | MSP7.4                                | XP_001350079.1 | P35        | EMP2/MESE                             | XP_001351567.1 |
| P16        | MSP7.5                                | XP_001350080.1 | P36        | Serine repeat antigen 5               | XP_001349586.1 |
| P17        | MSP8                                  | XP_001351583.1 | P37        | methionine-tRNA ligase                | XP_001347624.1 |
| P18        | MSP9                                  | XP_001350683.1 | P38        | Endoplasmic homolog                   | XP_001350620.1 |
| P19        | MSP10                                 | XP_966190.1    | P39        | <i>P. vivax</i> CSP                   | AAA29535.1     |
| P20        | MSP11                                 | XP_001347636.1 | P40        | <i>P. falciparum</i> CSP              | ADF48458.1     |

\*The 2038 peptides come from P01 to P38, no peptides gave a detectable response on a slide with only buffer and secondary antibody.

**Extended Data Table 2.** Information of serum.

|                       | Quantity | Origin               | Source                         | Usage                            |
|-----------------------|----------|----------------------|--------------------------------|----------------------------------|
| <b>Training group</b> | 179      | <i>P. falciparum</i> |                                | First-round screening            |
|                       | 110      | <i>P. falciparum</i> | South east of China            | Second-round screening           |
|                       | 176      | <i>P. vivax</i>      |                                | homology analysis                |
|                       | 125      | Healthy              | Jiangsu Province, East China   | First-round screening            |
|                       | 89       | Healthy              | Liaoning province, North China | Second-round screening           |
| <b>Testing group</b>  | 244      | <i>P. falciparum</i> |                                | RDT test of <i>P. falciparum</i> |
|                       | 215      | <i>P. vivax</i>      | Yunnan Province, South China   | RDT test of <i>P. vivax</i>      |
|                       | 1043     | Healthy              |                                | RDT test of control              |

## Data analysis

$R_{\text{dot}}$  was the readout of H-IgG/peptide dot,  $R_{\text{neg.}}$  was the readout of negative control dot. All the data were extracted with AMIA Toolbox<sup>2</sup>.

$R_{\text{mean dot}}$  was the mean value of 3  $R_{\text{dot}}$  and  $R_{\text{mean neg.}}$  was the mean value of 3  $R_{\text{neg.}}$ .

Signal to noise ratio (SNR) was defined by the following equations:

For training group,  $\text{SNR} = (R_{\text{dot}} - R_{\text{mean neg.}}) / R_{\text{mean neg.}}$ .

For test group,  $\text{SNR} = (R_{\text{mean dot}} - R_{\text{mean neg.}}) / R_{\text{mean neg.}}$ .

The intensity-cutoff value for each individual peptide was calculated using the 125 negative samples with the following equation: **Intensity - cutoff** =  $\text{SNR}_{\text{mean}} + 3\sigma$ , where  $\sigma$  means standard deviation.

**Coverage** is defined as the percentage of the numbers of positive (negative) samples with  $\text{SNR} \geq \text{cutoff}$  among the total numbers of positive (negative) samples.

**Sensitivity** is defined as the percentage of positive tests among the total number of positive samples.

**Specificity** is the percentage of negative tests among the total number of negative samples. The total number of positive/negative samples is the number detected by microscopy in blood slides.

**100% - specificity** is equivalent to false positive fraction.

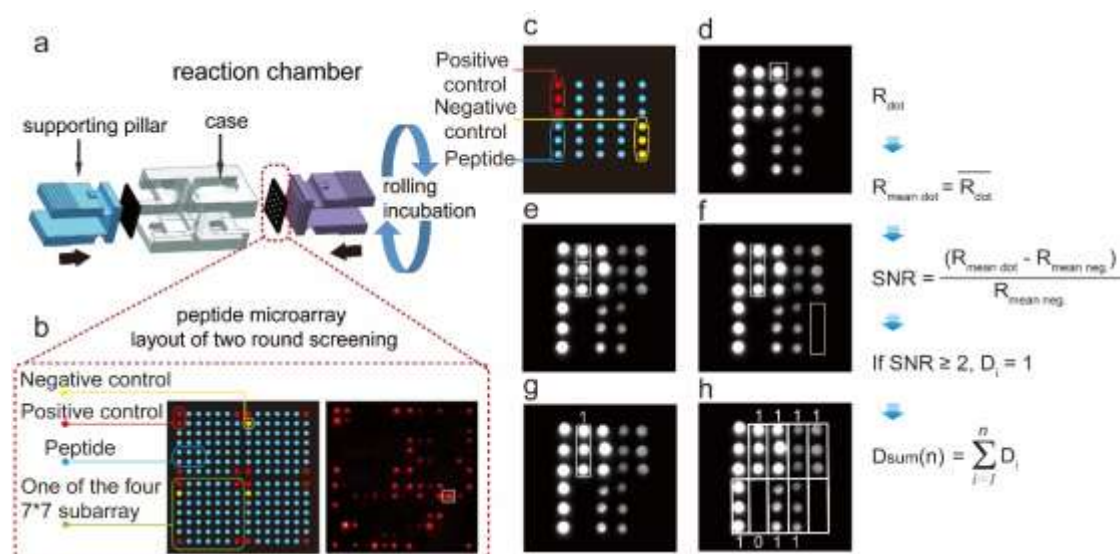

**Extended Data Figure 2** Peptide microarray layout and **illustration for the workflow of data analysis.** (a) The illustration of double-side reaction chamber. Microarray chip were stuck on the supporting pillar and assembled with a plastic case to form a reaction chamber. This chamber then conducted a rolling incubation processes by a rotation incubator for homogeneous reaction. (b) The design interprets the microarray pattern on chip for training group. The array inside the green square was one of four  $7 \times 7$  subarrays. The picture shows one typical result of training group. (c) The design of microarray for test group. (d-h) Data analysis protocol. (d)  $R_{\text{dot}}$  was the readout of one dot. (e)  $R_{\text{mean dot}}$  was the mean value of 2 repeated  $R_{\text{dot}}$  for training group and 3 repeated  $R_{\text{dot}}$  for test group. (f) Signal to noise ratio (SNR) was calculated by the formula of

$R_{\text{mean dot}}$  and  $R_{\text{mean neg.}}$  (g) if a peptide has  $\text{SNR} \geq 2$ , we assign  $D_i = 1$  or else  $D_i = 0$ . (h)  $D_{\text{sum}}(\mathbf{n})$  was defined as the sum of  $D_i$  from one microarray. The equation on the right side reflects the corresponding data conversion process of the right protocol.

**Extended Data Table 3.** Results of significance analysis of microarrays (SAM)<sup>3</sup> to all peptides v.s. selected ECPs after three-mode analysis.

| <b>Protein</b> | <b>length(aa)</b> | <b>Peptides</b> | <b>SAM 1</b> | <b>ECPs</b> | <b>SAM 2</b> |
|----------------|-------------------|-----------------|--------------|-------------|--------------|
| <b>P01</b>     | 278               | 18              | 9            | 0           | 0            |
| <b>P02</b>     | 248               | 16              | 7            | 0           | 0            |
| <b>P03</b>     | 1720              | 114             | 33           | 3           | 2            |
| <b>P04</b>     | 272               | 18              | 9            | 0           | 0            |
| <b>P05</b>     | 393               | 26              | 14           | 4           | 2            |
| <b>P06</b>     | 697               | 46              | 23           | 0           | 0            |
| <b>P07</b>     | 1233              | 82              | 41           | 28          | 23           |
| <b>P08</b>     | 354               | 23              | 10           | 0           | 0            |
| <b>P09</b>     | 272               | 18              | 9            | 3           | 1            |
| <b>P10</b>     | 272               | 18              | 8            | 1           | 1            |
| <b>P11</b>     | 371               | 24              | 12           | 0           | 0            |
| <b>P12</b>     | 459               | 30              | 16           | 3           | 0            |
| <b>P13</b>     | 309               | 20              | 10           | 1           | 0            |
| <b>P14</b>     | 298               | 19              | 7            | 1           | 0            |
| <b>P15</b>     | 281               | 18              | 9            | 1           | 0            |
| <b>P16</b>     | 380               | 25              | 12           | 1           | 0            |
| <b>P17</b>     | 597               | 39              | 15           | 1           | 0            |
| <b>P18</b>     | 743               | 49              | 23           | 6           | 3            |
| <b>P19</b>     | 525               | 34              | 15           | 5           | 4            |
| <b>P20</b>     | 405               | 26              | 10           | 0           | 0            |
| <b>P21</b>     | 1502              | 100             | 42           | 7           | 2            |
| <b>P22</b>     | 1567              | 104             | 30           | 7           | 3            |
| <b>P23</b>     | 1210              | 80              | 37           | 5           | 3            |
| <b>P24</b>     | 1388              | 92              | 14           | 0           | 0            |
| <b>P25</b>     | 622               | 41              | 19           | 8           | 4            |
| <b>P26</b>     | 540               | 35              | 17           | 4           | 0            |
| <b>P27</b>     | 782               | 52              | 23           | 5           | 2            |
| <b>P28</b>     | 1378              | 91              | 23           | 2           | 0            |
| <b>P29</b>     | 897               | 59              | 15           | 0           | 0            |
| <b>P30</b>     | 1440              | 95              | 11           | 2           | 0            |
| <b>P31</b>     | 1417              | 94              | 24           | 4           | 0            |
| <b>P32</b>     | 1416              | 94              | 26           | 6           | 2            |
| <b>P33</b>     | 1340              | 89              | 18           | 5           | 1            |
| <b>P34</b>     | 1394              | 92              | 17           | 4           | 2            |
| <b>P35</b>     | 1434              | 95              | 46           | 26          | 15           |
| <b>P36</b>     | 997               | 66              | 24           | 4           | 2            |
| <b>P37</b>     | 889               | 59              | 14           | 3           | 0            |
| <b>P38</b>     | 821               | 54              | 12           | 3           | 0            |
| <b>Sum</b>     | 31141             | 2038            | 704          | 153         | 72           |

The numbers for each protein of the 38 tested *P. falciparum* proteins: **length (aa)** - the total number of aa; **Peptides**: number of 30/15 overlapping peptides derived from a candidate protein; **SAM 1**: peptides (potential diagnostic epitopes) selected by SAM analysis to all peptides from a candidate protein; **ECPs**: Number of ECPs (potential diagnostic epitopes) selected by epitope scan; **SAM 2**: peptides (potential diagnostic

epitopes) selected by SAM after epitope scan. Differentially responsive peptide were identified by using the  $t$  test procedure within SAM. The P value was adjusted, and false discovery rate (FDR)  $< 0.05$  and fold change above 2 were selected as the cutoff criteria.

Ordinary cluster arithmetic can hardly get significant classification when dealing with large numbers of samples, peptides and complicated SNR data even supported by manual adjustment of parameters. Cluster result often reflect the relationship between serum sample and peptide marker while SAM select the different expression peptide marker between positive and negative samples which is more applicable in diagnostic biomarker discovery. The application of SAM to all peptides resulted in 704 peptides (**SAM 1**) as peptides (epitopes) of diagnostic potential. By applying our three-mode analysis, only 153 peptides (**ECPs**) were selected. Further analysis of SAM could reduce this number to 72 (**SAM 2**), a reasonable number for clustering.

With the assistance of three-mode analysis, we easily identified ECPs and understood the complexity of epitope composition. This method has important reference value for further application of peptide diagnosis and even the investigation of immunopathogenesis.

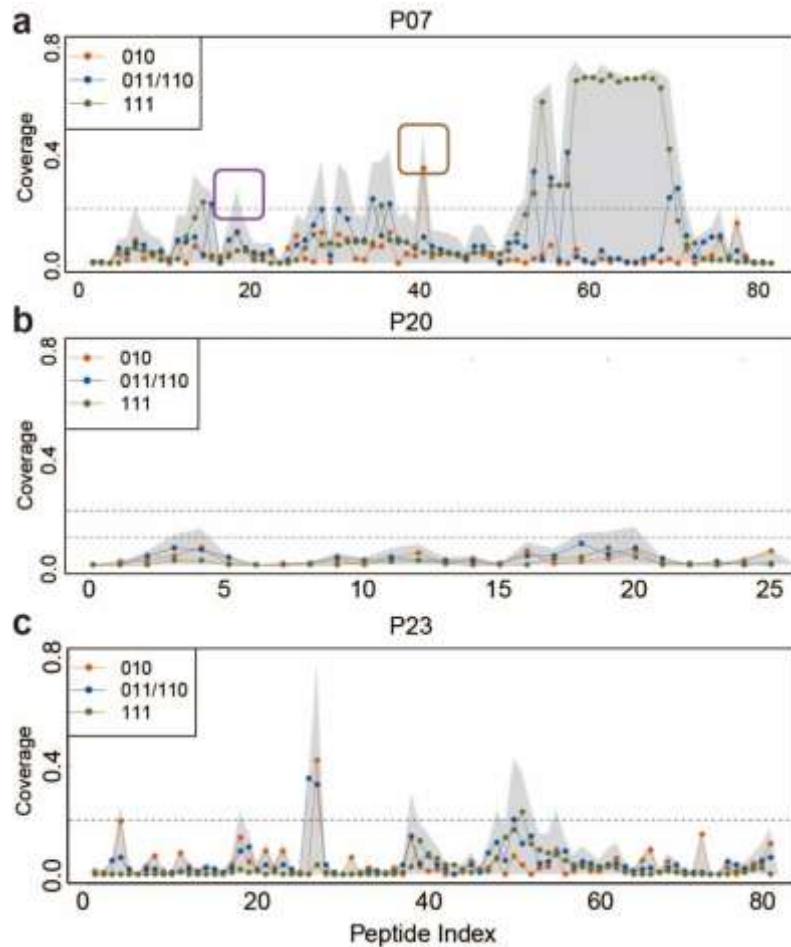

**Extended Data Figure 3 The result of three-mode analysis. a-c were representative results for 38 *P. falciparum* proteins.** (a) P07: abundant in epitopes; (b) P20: nearly free of epitope; and (c) P23: a medium number of epitopes. **Figure 3h, Extended Data Figure 3a-c** were constructed to visualize the statistical analysis of mode distribution for all the serum (**Figure 3g**). Horizontal axis is peptide locus and vertical axis represents the coverage value of each mode. The distribution of different mode are described as different color curves and the total coverage of all of the three modes is described as the area graph (grey) behind the curves. For example, 34.6% of serum was 010 mode for P7-40 three-mode analysis unit (brown box in **Extended Data Fig. 3a**, red line), 9.5% was 110/011 mode (blue line) and 3.9% was 111 mode (green line), the gray background stood for the sum (48.0%) of the three modes.

According to the general rule of diagnostic kit development<sup>4</sup>, distributions of Coverage vs. SNR should be first constructed for both healthy and infected people in order to define an intensity cutoff value (**Extended Data Fig. 4**). For clarity, we further converted Frequency to Density (**Extended Data Fig. 5**). Each of the 8 ECPs could be viewed as the antigen in the traditional method (the left and middle panels of **Extended Data Fig. 4**) and Pep 6 was shown as a representative case (**Extended Data Fig. 5**). For an intensity-cutoff of SNR = 2.3, obtained was a satisfactory specificity at 98.4% (the grey area under Density curve). However, a sensitivity of 73.2% (the red area under Density curve) does not qualify Pep 6 as a diagnostic biomarker. From **Extended Data Table 4**, all of the 8 *P. falciparum* ECPs had satisfactory specificity, which reflected the fact that *P. falciparum* is a rare infection to Chinese<sup>5</sup>. Unfortunately, none is individually sensitive enough to be a diagnostic biomarker (i.e., > 90%). Although reset of the intensity-cutoff from SNR = 2.3 to 1 resulted in an increased sensitivity (84.4%), it was accompanied with a decreased specificity (89.6%) (**Extended Data Table 4**). Thus, we concluded that these epitopes were insufficient in sensitivity when used in the single index mode.

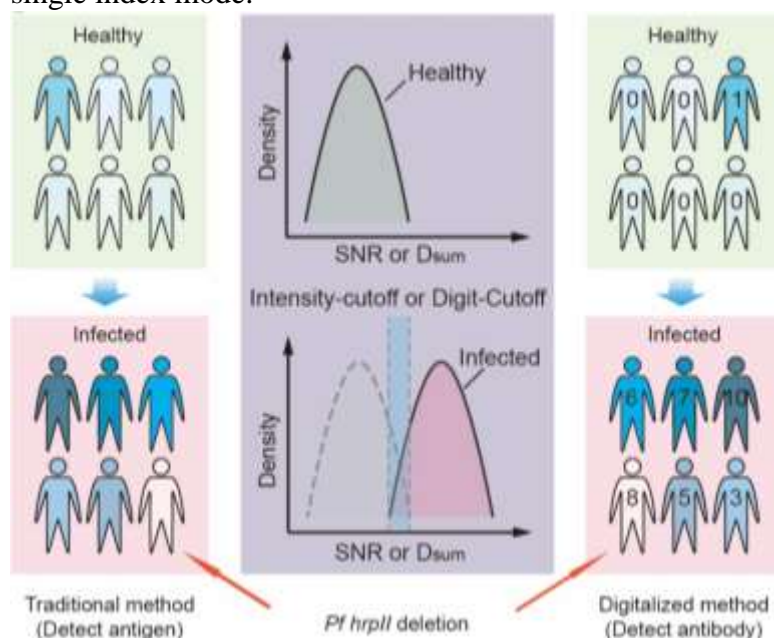

**Extended Data Figure 4 Principles of different assays.** Although both methods comply with the same general rule of cutoff definition (middle), the traditional method (left panel) uses intensity-cutoff and the binary/digital method (right) uses digit-cutoff. The traditional method is intrinsically false-negative to those HRPII deleted infection, while the binary/digital method is able to detect such infection.



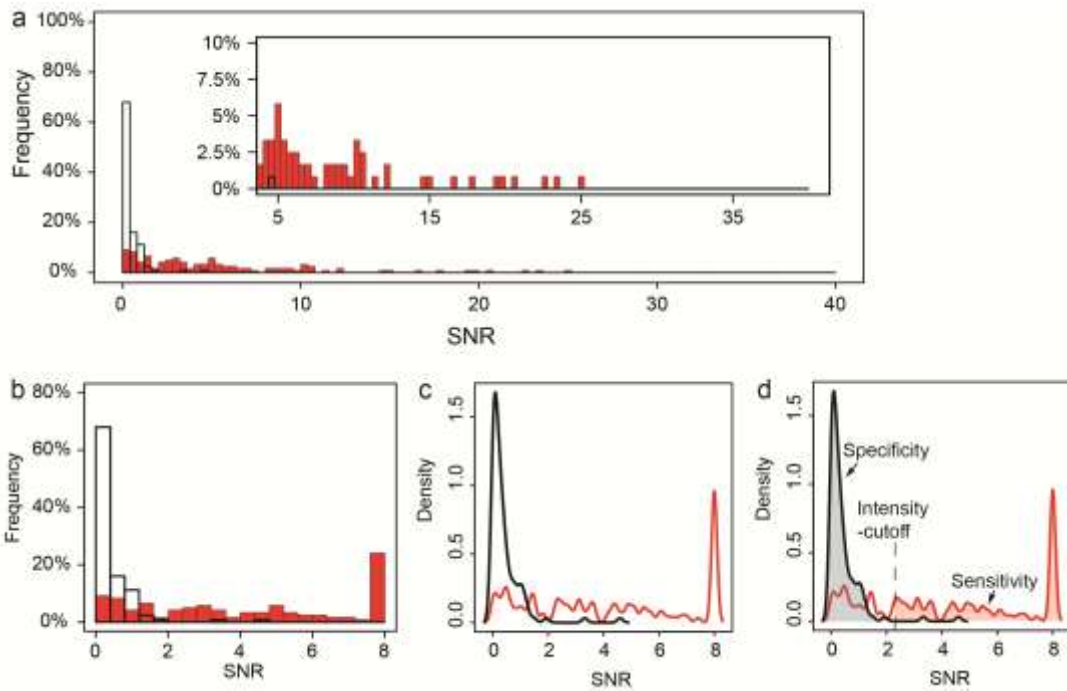

**Extended Data Figure 5 Converting SNR vs. Frequency distribution to SNR vs. Density distribution<sup>6,7</sup>.** (a) The SNR vs. frequency plot was constructed from raw data, in which each column stands for the percentage of all sample's response in the corresponding SNR interval of X-axis. Graphic in the range of 3 to 40 of X-axis was amplified as insert image. (b) The SNR that greater than 8 was set to 8. (c) By dividing the frequency by the interval bandwidth, the SNR vs. frequency plot was converted to SNR vs. density plot, which means the whole area under the curve was 1. (d) The areas surrounded by curves and cutoff-line represent the specificity & sensitivity.

**Extended Data Table 4** Sensitivity and false positive fraction of 8 ECPs from the training group at different intensity-cutoff

|       | SNR = 1 |                  | SNR = 2 |                  | SNR = 3 |                  |
|-------|---------|------------------|---------|------------------|---------|------------------|
|       | Sens.*  | 100%-Specificity | Sens.   | 100%-Specificity | Sens.   | 100%-Specificity |
| Pep 1 | 77.1%   | 0.0%             | 72.6%   | 0.0%             | 68.2%   | 0.0%             |
| Pep 2 | 79.3%   | 1.6%             | 74.3%   | 1.6%             | 72.6%   | 0.8%             |
| Pep 3 | 78.2%   | 9.6%             | 68.2%   | 0.0%             | 62.6%   | 0.0%             |
| Pep 4 | 88.8%   | 24.8%            | 78.2%   | 6.4%             | 65.4%   | 2.4%             |
| Pep 5 | 75.4%   | 4.8%             | 65.9%   | 0.8%             | 60.3%   | 0.8%             |
| Pep 6 | 84.4%   | 10.4%            | 75.4%   | 1.6%             | 63.1%   | 1.6%             |
| Pep 7 | 67.0%   | 11.2%            | 55.3%   | 2.4%             | 46.4%   | 0.8%             |
| Pep 8 | 41.3%   | 5.6%             | 30.2%   | 1.6%             | 24.0%   | 1.6%             |

\*Sens.: Sensitivity

For the traditional multiplexing strategy, a sample is judged as a positive sample if any one of the 8 *P. falciparum* peptides has a SNR larger than its individual intensity-cutoff value. Compared with the single index assay, although traditional multiplexing strategy increased the sensitivity from below 80% to 97.2%, an 86.4% specificity disqualified this combination as a *P. falciparum* diagnostic tool. Such contradiction of tuning sensitivity and specificity is commonly observed in multiplexing assay development<sup>8</sup>.

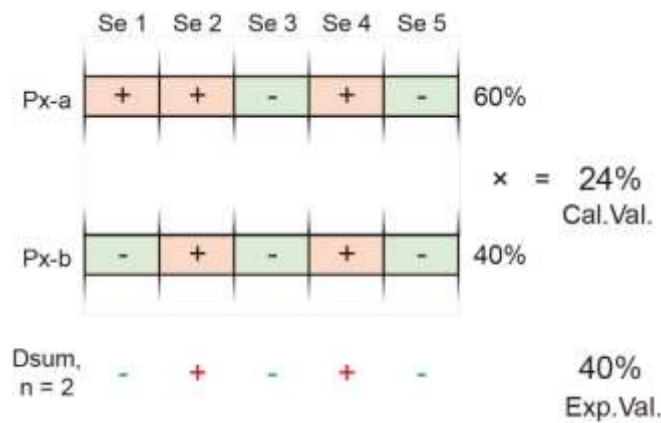

**Extended Data Figure 6 Illustration of Cal. Val. and Exp. Val.** Px-a and Px-b represent two of the selected ECPs, Se1~Se5 represent 5 serum samples. “+” symbol in red box represent a positive result of serum-peptide interaction ( $SNR \geq 2$ ), “-” symbol in blue box represent a negative result of serum-peptide interaction ( $SNR < 2$ ). The coverage of Px-a is 60% (3/5), and of Px-b is 40% (2/5), so the Cal.Val. of these two ECPs is  $60\% \times 40\% = 24\%$ . When use  $D_{sum}$  principle, digital cutoff  $n=2$ , Se1,3,5 were regarded as negative, and Se2,4 were regarded as positive, so the Exp.Val. of these two ECPs is 40% (2/5). The Exp.Val. usually larger than Cal.Val. when calculating by  $D_{sum}$  principle.

For single index (i.e., one peptide), the calculated value is the same as experimental value so they all located along the diagonal line (the open dots in **Fig. 5c** in main text). For any two-peptide combination, we noticed most of the solid red dots are randomly distributed at the upper left side of the diagonal line, indicating any two peptides dominantly present positive correlation. Since the sensitivity of single peptide is  $< 100\%$ , the sensitivity of any two-peptide combination is smaller than each of the two peptides. The increased overall sensitivity must be attributed to the increase of combinations, from 8 to 28.

Similarly, the specificity of these 28 combinations could be obtained for the healthy samples. Given that our healthy control samples are from areas where *P. falciparum* is a rare infection, the low level of false positive (i.e., 100%-specificity) was due to nonspecific interactions, which are highly possible given the low binary-cutoff of  $SNR = 2$ . The combination of such rare and independent events must be even rarer, which is true as indicated by the near zero experimental values (the black dots in **Fig. 5c** in main text). Thus, a simultaneous increase of sensitivity and specificity was achieved.

It is predictable that with the digit-cutoff  $n$  increases, the specificity will increase (or saturated at 100%), as shown in **Fig. 5d** for  $D_{sum, P. falciparum} \geq 3$ . However, the sensitivity of  $D_{sum, P. falciparum} \geq 3$  decreased to 86%, which was attributed to the fact that the increase of number of combinations ( $C_8^3$ , from 28 to 56) does not compensate the decrease of sensitivities of each three-peptide combination. For example, Pep1, 2 and 3 had sensitivity at 72.6%, 74.3% and 68.2%, respectively. The Pep1-2-3 combination gave a calculated value of 0.368 and an experimental value of 0.564. The overall trend of experimental value deviating from the diagonal line may imply intrinsic connections to the immune system but this is not the topic of this study and will be reported elsewhere.

**Extended Data Table 5: Homology analysis of 39 *P. falciparum* proteins against *P. vivax* proteins.**

| ID  | Query Protein<br>( <i>P. falciparum</i> ) | Query ID       | BLAST Hit Protein<br>( <i>P. vivax</i> ) | Hit ID         | Query<br>Cover | Ident | MaxScore | TotalScore | E Value   |
|-----|-------------------------------------------|----------------|------------------------------------------|----------------|----------------|-------|----------|------------|-----------|
| P01 | HRPII                                     | XP_002808743.1 | hypothetical protein                     | XP_001614388.1 | 87%            | 30%   | 33.1     | 347        | 6.00E-05  |
| P02 | HRPIII                                    | CAX64409.1     | hypothetical protein                     | XP_001616649.1 | 30%            | 30%   | 60.8     | 164        | 1.00E-14  |
| P03 | MSP1                                      | XP_001352170.1 | MSP1                                     | ADF48786.1     | 97%            | 39%   | 1010     | 1138       | 0.00E+00  |
| P04 | MSP2                                      | XP_001349578.1 | hypothetical protein                     | XP_001616969.1 | 85%            | 22%   | 44.7     | 341        | 3.00E-08  |
| P05 | MCP1                                      | XP_001347552.1 | MCP1                                     | XP_001608496.1 | 49%            | 52%   | 207      | 207        | 1.00E-65  |
| P06 | DBLMSP                                    | XP_001347632.1 | nEBP                                     | AHC92543.1     | 50%            | 25%   | 100      | 117        | 5.00E-26  |
| P07 | GLURP                                     | XP_001347628.1 | MSP3                                     | ADD39047.1     | 3%             | 38%   | 31.6     | 31.6       | 2.00E-04  |
| P08 | MSP 3                                     | XP_001347629.1 | MSP3                                     | XP_001613198.1 | 37%            | 36%   | 50.8     | 129        | 7.00E-11  |
| P09 | MSP 4                                     | XP_001349580.1 | MSP4                                     | ADF48689.1     | 43%            | 43%   | 76.6     | 76.6       | 2.00E-21  |
| P10 | MSP 5                                     | XP_001349579.1 | MSP5                                     | ACZ55104.1     | 72%            | 45%   | 152      | 170        | 2.00E-47  |
| P11 | MSP 6                                     | XP_001347630.1 | MSP3a                                    | XP_001613201.1 | 22%            | 49%   | 48.9     | 95.5       | 2.00E-10  |
| P12 | MSP7.1                                    | XP_001350074.1 | MSP7.1,Partial                           | AEZ00476.1     | 65%            | 33%   | 105      | 144        | 1.00E-29  |
| P13 | MSP7.2                                    | XP_001350075.1 | Putative MSP7                            | ADD39060.1     | 73%            | 30%   | 97.8     | 117        | 2.00E-27  |
| P14 | MSP7.3                                    | XP_002809050.1 | MSP7                                     | ACY66915.1     | 87%            | 23%   | 58.5     | 91.6       | 2.00E-14  |
| P15 | MSP7.4                                    | XP_001350079.1 | MSP7                                     | ACY66923.1     | 68%            | 39%   | 107      | 136        | 4.00E-31  |
| P16 | MSP7.5                                    | XP_001350080.1 | MSP7                                     | XP_001614137.1 | 62%            | 37%   | 138      | 138        | 4.00E-41  |
| P17 | MSP8                                      | XP_001351583.1 | MSP8,Partial                             | AFL93303.1     | 56%            | 48%   | 343      | 343        | 3.00E-115 |
| P18 | MSP9                                      | XP_001350683.1 | MSP9                                     | AGR50726.1     | 79%            | 33%   | 243      | 261        | 3.00E-72  |
| P19 | MSP10                                     | XP_966190.1    | MSP10                                    | ADV19192.1     | 41%            | 57%   | 211      | 227        | 9.00E-66  |
| P20 | MSP11                                     | XP_001347636.1 | hypothetical protein                     | ADD39021.1     | 11%            | 45%   | 32.7     | 46.2       | 8.00E-06  |
| P21 | EBA-175                                   | XP_001349207.2 | nEBP                                     | AHC92543.1     | 61%            | 29%   | 145      | 340        | 2.00E-39  |

**Extended Data Table 5 (continued):**

| <b>ID</b>  | <b>Query Protein<br/>(<i>P. falciparum</i>)</b> | <b>Query ID</b> | <b>BLAST Hit Protein<br/>(<i>P. vivax</i>)</b> | <b>Hit ID</b>  | <b>Query<br/>Cover</b> | <b>Ident</b> | <b>MaxScore</b> | <b>TotalScore</b> | <b>E Value</b> |
|------------|-------------------------------------------------|-----------------|------------------------------------------------|----------------|------------------------|--------------|-----------------|-------------------|----------------|
| <b>P22</b> | EBA-181                                         | XP_001350957.1  | Duffy receptor precursor                       | XP_001608387.1 | 46%                    | 31%          | 124             | 355               | 1.00E-32       |
| <b>P23</b> | EBA-140                                         | XP_001349859.1  | nEBP                                           | AHC92543.1     | 90%                    | 27%          | 184             | 303               | 5.00E-52       |
| <b>P24</b> | EBA-165                                         | XP_001351546.1  | DBP Variant 202                                | AAG53623.1     | 37%                    | 34%          | 136             | 211               | 4.00E-38       |
| <b>P25</b> | AMA-1                                           | XP_001348015.1  | AMA-1                                          | ACB42434.1     | 88%                    | 60%          | 683             | 704               | 0.00E+00       |
| <b>P26</b> | PF332                                           | XP_001348162.2  | DBSP region II                                 | ACN69890.1     | 45%                    | 27%          | 64.7            | 92.8              | 7.00E-16       |
| <b>P27</b> | RAP1                                            | XP_001348275.1  | RAP1                                           | ADH84046.1     | 99%                    | 39%          | 510             | 510               | 1.00E-173      |
| <b>P28</b> | RhopH2                                          | XP_002808967.1  | Rhop2                                          | XP_001614833.1 | 98%                    | 50%          | 1373            | 1373              | 0.00E+00       |
| <b>P29</b> | RhopH3                                          | XP_001351928.1  | Rhop3                                          | ABR10715.1     | 95%                    | 55%          | 1000            | 1000              | 0.00E+00       |
| <b>P30</b> | CLAG2                                           | XP_001349709.1  | CLAG                                           | XP_001616939.1 | 90%                    | 45%          | 1117            | 1117              | 0.00E+00       |
| <b>P31</b> | CLAG3.1                                         | XP_001351100.1  | CLAG                                           | XP_001616939.1 | 96%                    | 44%          | 1134            | 1134              | 0.00E+00       |
| <b>P32</b> | CLAG3.2                                         | XP_001351099.1  | CLAG                                           | XP_001616939.1 | 95%                    | 45%          | 1140            | 1140              | 0.00E+00       |
| <b>P33</b> | CLAG9                                           | XP_001352222.1  | CLAG7                                          | ADV19052.1     | 99%                    | 53%          | 1446            | 1446              | 0.00E+00       |
| <b>P34</b> | CLAG8                                           | XP_002808744.1  | CLAG                                           | XP_001614324.1 | 94%                    | 45%          | 1098            | 1098              | 0.00E+00       |
| <b>P35</b> | EMP2/MESE                                       | XP_001351567.1  | hypothetical protein                           | XP_001615965.1 | 15%                    | 52%          | 79              | 219               | 5.00E-18       |
| <b>P36</b> | Serine repeat antigen 5                         | XP_001349586.1  | Serine repeat antigen                          | XP_001612999.1 | 94%                    | 44%          | 665             | 766               | 0.00E+00       |

**Extended Data Table 6 Sensitivity, specificity, negative and positive predictive values and AUC of 8 ECPs in detecting training group.**

| peptide      | Sensitivity (95% CI) | Specificity (95% CI) | PPV* (95%CI)    | NPV** (95%CI)   | AUC (95% CI)    |
|--------------|----------------------|----------------------|-----------------|-----------------|-----------------|
| <b>Pep 1</b> | 0.69(0.62,0.76)      | 1.00(0.96,1.00)      | 1.00(0.96,1.00) | 0.69(0.62,0.76) | 0.87(0.83,0.92) |
| <b>Pep 2</b> | 0.73(0.66,0.80)      | 0.98(0.94,1.00)      | 0.98(0.95,1.00) | 0.72(0.65,0.79) | 0.90(0.86,0.93) |
| <b>Pep 3</b> | 0.68(0.61,0.75)      | 0.99(0.96,1.00)      | 0.99(0.96,1.00) | 0.69(0.61,0.75) | 0.86(0.82,0.90) |
| <b>Pep 4</b> | 0.80(0.73,0.85)      | 0.94(0.88,0.97)      | 0.95(0.90,0.98) | 0.76(0.69,0.83) | 0.92(0.88,0.95) |
| <b>Pep 5</b> | 0.66(0.59,0.73)      | 0.99(0.96,1.00)      | 0.99(0.95,1.00) | 0.67(0.60,0.74) | 0.88(0.84,0.92) |
| <b>Pep 6</b> | 0.75(0.68,0.82)      | 0.98(0.94,1.00)      | 0.99(0.95,1.00) | 0.74(0.66,0.80) | 0.93(0.90,0.96) |
| <b>Pep 7</b> | 0.55(0.48,0.63)      | 0.97(0.92,0.99)      | 0.96(0.90,0.99) | 0.60(0.53,0.67) | 0.87(0.83,0.91) |
| <b>Pep 8</b> | 0.30(0.24,0.37)      | 0.98(0.94,1.00)      | 0.96(0.88,1.00) | 0.50(0.43,0.56) | 0.83(0.78,0.87) |
| <b>Total</b> | 0.97(0.94,0.99)      | 0.86(0.78,0.91)      | 0.91(0.86,0.94) | 0.96(0.90,0.99) | 0.98(0.97,1.00) |

\*PPV: positive predictive values

\*\*NPV: negative predictive values

**Extended Data Table 7 Validation of the statistical correlation.**

|                       |          | <i>P. falciparum</i> | Healthy | Sensitivity (95% CI) | Specificity (95% CI) | PPV (95%CI)     | NPV (95%CI)     | kappa index (P value*) |
|-----------------------|----------|----------------------|---------|----------------------|----------------------|-----------------|-----------------|------------------------|
| <b>Training group</b> | Positive | 166                  | 2       | 0.93(0.88,0.96)      | 0.98(0.94,1.00)      | 0.99(0.96,1.00) | 0.90(0.84,0.95) | 0.90(<0.01)            |
|                       | Negative | 13                   | 123     |                      |                      |                 |                 |                        |
| <b>Test group</b>     | Positive | 231                  | 9       | 0.95(0.91,0.97)      | 0.99(0.98,1.00)      | 0.96(0.93,0.98) | 0.99(0.98,0.99) | 0.94(<0.01)            |
|                       | Negative | 13                   | 1034    |                      |                      |                 |                 |                        |

\*U test

1. Zhang, Y. et al. Proteomic Analysis of Plasmodium falciparum Schizonts Reveals Heparin-Binding Merozoite Proteins. *Journal of Proteome Research* **12**, 2185-2193 (2013).
2. White, A.M., Daly, D.S., Willse, A.R., Protic, M. & Chandler, D.P. Automated Microarray Image Analysis Toolbox for MATLAB. *Bioinformatics* **21**, 3578-3579 (2005).
3. Tusher, V.G., Tibshirani, R. & Chu, G. Significance analysis of microarrays applied to the ionizing radiation response. *Proc Natl Acad Sci U S A* **98**, 5116-5121 (2001).
4. Edward A. Sasse, P.D. et al. How to Define and Determine Reference Intervals in the Clinical Laboratory; Approved Guideline, Vol. **20**, Edn. Second Edition. (NCCLS, USA; 2000).
5. Tao, Z.Y. et al. Congenital Malaria in China. *PLoS Negl Trop Dis* **8**, e2622 (2014).
6. SCOTT, D.W. Multivariate Density Estimation: Theory, Practice, and Visualization. (JOHN WILEY & SONS, INC., USA; 1992).
7. Venables, W.N. & Ripley, B.D. Modern Applied Statistics With S, Edn. 4th. (springer, USA; 2002).
8. Chapman, C.J. et al. Autoantibodies in lung cancer: possibilities for early detection and subsequent cure. *Thorax* **63**, 228-233 (2008).
